# Supplementary material
Source: Springer Nature journal article supplement (https://www.springermedizin.de/resource/supplementary/12885_2012_3774_MOESM1_ESM.pdf/9464414)
Supplement: MOESM1 [file 9464414]

## Pathological stage III colon cancer after curative resection

### Treatment outcomes

- Efficacy: DFS, RFS, OS
- Safety: adverse events

### Analysis of relationship

### Tumor Expression of biomarkers

- 1) Protein of TP, DPD, EGFR, VEGF
- 2) mRNA of TP, DPD, TS, OPRT

### Adjuvant chemotherapy

- Treatment regimen
- Drug dose
- Duration of treatment
